# Supplementary material
Source: HighWire-hosted journal article supplement (https://rapm.bmj.com/highwire/filestream/21671/field_highwire_adjunct_files/6/rapm-2022-104236supp007_data_supplement.pdf)
Supplement: rapm-2022-104236supp007_data_supplement.pdf [file rapm-2022-104236supp007_data_supplement.pdf]

Supplemental Table 7. Cox and Logistic Model Results of Safety Events, Unmatched Cohorts without Adjusting for Patient Characteristics

| Independent Variables | Rate of post-operative complication |         | Risk of a short-term life-threatening event |         |
|-----------------------|-------------------------------------|---------|---------------------------------------------|---------|
|                       | HR (LCL, UCL)                       | p value | OR (LCL, UCL)                               | p value |
| ISD (vs MILD)         | 1.02 (0.84, 1.25)                   | 0.822   | 0.88 (0.58, 1.35)                           | 0.564   |

HR, hazard ratio; ISD, interspinous spacer; LCL, lower confidence limit; MILD, minimally invasive lumbar decompression; OR, odds ratio; UCL, upper confidence limit
